# Supplementary material for: Regulatory effects of Lactobacillus zhachilii HBUAS52074T on depression-like behavior induced by chronic social defeat stress in mice: modulation of the gut microbiota
Source: Royal Society of Chemistry journal article supplement (doi:10.1039/d4fo04542d), 2024-12-13
Supplement: d4fo04542d1.pdf [file d4fo04542d1.pdf]

1 **Supplementary materials**

2 **Fig. S1.** Phylum-level composition of the gut microbiome in susceptible mice. Major  
3 (>1% relative abundance) phyla in fecal samples from susceptible mice (A). Relative  
4 abundance of the dominant *Bacteroidetes*, *Firmicutes*, *Proteobacteria*, *Actinobacteria*,  
5 and *Verrucomicrobia* phyla in the gut microbiota of susceptible mice. CON, control  
6 mice gavage with VEH; DEP, susceptible mice gavage with VEH; DEP + *L. zhachilii*,  
7 susceptible mice gavage with *Lactobacillus zhachilii* HBUAS52074<sup>T</sup> (B).

8

9

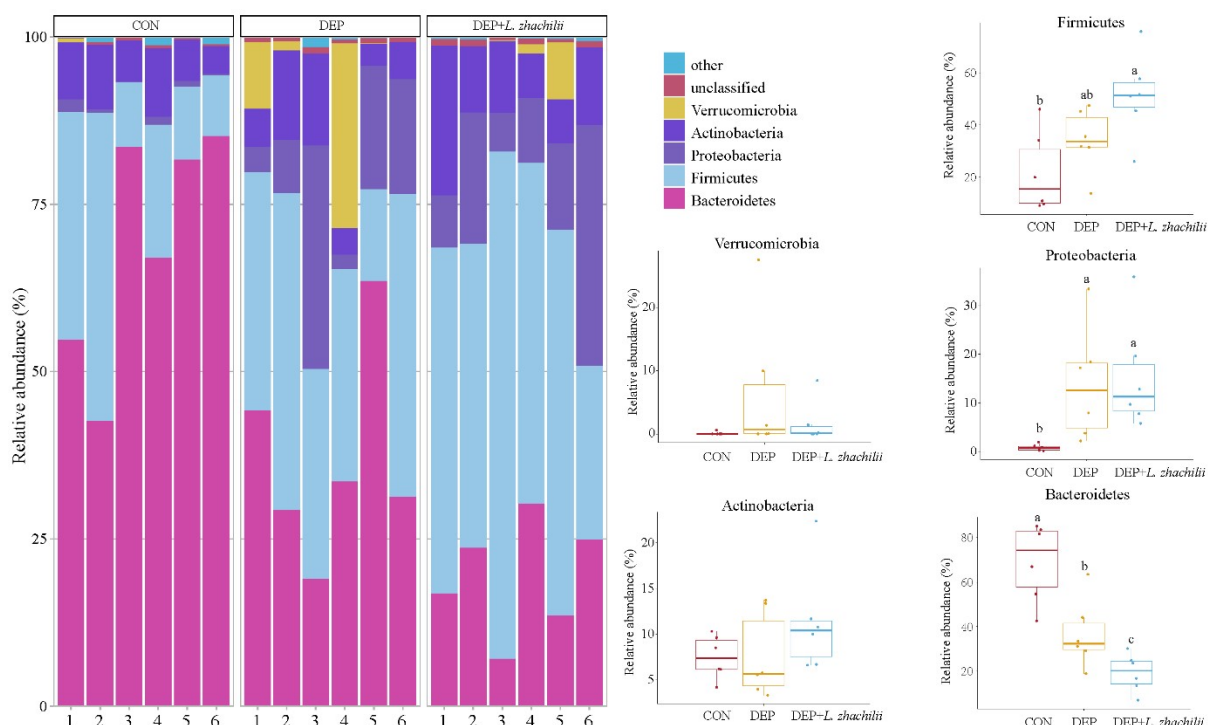

10

11

12

13

14

15

16

17

18 Table S1 Gene-specific primer sequences for RT-qPCR

19

| Gene         | Forward (5' - 3' )    | Reverse (5' - 3' )        |
|--------------|-----------------------|---------------------------|
| <i>TLR4</i>  | GCAGAAAATGCCAGGATGATG | AACTACCTCTATGCAGGGATTCAAG |
| <i>TNF-α</i> | TAGCCAGGAGGGAGAACAGA  | TTTCTGGAGGGAGATGTGG       |

---

|                |                         |                        |
|----------------|-------------------------|------------------------|
| <i>IFN-γ</i>   | CATCAGCAACAACATAAGCGTCA | CGCTGGACCTGTGGGT       |
| <i>IL-6</i>    | ATTTCCTCTGGTCTTCTGG     | CTGGCTTTGTCTTCTTGT     |
| <i>Arg1</i>    | GAACCCAACCTTTGGGAAGAC   | GGAGAAGGCGTTGCTTAGTT   |
| <i>β-actin</i> | GGCTGTATTCCCCTCCATCG    | CCAGTTGGTAACAATGCCATGT |

---

20

21 TLR4: Toll-like receptor 4; TNF- $\alpha$ , Tumor necrosis factor- $\alpha$ ; **IFN- $\gamma$ : Interferon-**

22 **gamma**; IL-6: Interleukin 6; Arg1: **Arginase 1**

23
